# Supplementary material for: UCNP@BSA@Ru nanoparticles with tumor-specific and NIR-triggered efficient PACT activity in vivo
Source: Royal Society of Chemistry journal article supplement (doi:10.1039/d1dt00777g), 2021-01-01
Supplement: d1dt00777g1.pdf [file d1dt00777g1.pdf]

## Electronic Supplementary Information for

### **UCNP@BSA@Ru nanoparticles with tumor-specific and NIR-triggered efficient PACT activity *in vivo***

Chao Zhang,<sup>ab</sup> Xusheng Guo,<sup>ab</sup> Xuwen Da,<sup>ab</sup> Yishan Yao,<sup>c</sup> Haihua Xiao,<sup>d</sup> Xuesong Wang,<sup>\*ab</sup> and Qianxiong Zhou,<sup>\*a</sup>

<sup>a</sup>*Key Laboratory of Photochemical Conversion and Optoelectronic Materials, Technical Institute of Physics and Chemistry, Chinese Academy of Sciences, Beijing 100190, P.R. China.*

<sup>b</sup>*University of Chinese Academy of Sciences, Beijing 100049, P.R. China.*

*E-mail: xswang@mail.ipc.ac.cn (X. Wang); zhouqianxiong@mail.ipc.ac.cn (Q. Zhou)*

<sup>c</sup>*Beijing Institute of Pharmacology and Toxicology, Beijing 100850, P. R. China.*

<sup>d</sup>*State Key Laboratory of Polymer Physics and Chemistry, Beijing National Laboratory for Molecular Sciences, Institute of Chemistry, Chinese Academy of Sciences, Beijing 100190, China.*

## **Experimental section**

### **Materials**

All chemicals were analytical grade and used without further purification. Thulium(III) acetate hydrate (99.9%), ytterbium(III) acetate tetrahydrate (99.9%), yttrium(III) acetate hydrate (99.9%), oleic acid (technical grade, 90%), 1-octadecene (technical grade, 90%), and ammonium fluoride (99.99+%), were purchased from Alfa Aesar. Poly(acrylic acid) (PAA MW = 1800) and bovine serum albumin (BSA) were purchased from Sigma-Aldrich. Ruthenium(III) chloride trihydrate, 1-ethyl-3-(3-dimethylaminopropyl) carbodiimide (EDC) and 4,7-diphenyl-1,10-phenanthroline were purchased from Inno-Chem. Annexin V-FITC/PI apoptosis detection kit and Calcein-AM/PI live/dead cell double staining kit were purchased from Solarbio. Dulbecco's modification of Eagle's medium (DMEM), penicillin, streptomycin, and fetal bovine serum were purchased from Corning.

### **Instruments**

An LED lamp ( $470 \pm 10$  nm) and 980 nm laser (Hi-Tech Optoelectronics Co., LOS-BLD-0980) were used as the light source for the irradiation assays. All UV-visible absorption spectra were acquired in aqueous solutions using Shimadzu UV-1601 spectrophotometer. TEM images were taken on a JEOL JEM2100F microscope operating at 200 kV. Upconverted emission spectra were collected on a Hitach 4600 photospectrometer coupled with a 980 nm laser device. Inductive

coupled plasma emission spectrometer atomic emission spectrometry (ICP-AES) measurements were performed on a Varian ICP-AES, 710-ES, USA. Laser confocal scanning microscope images were collected on an Olympus FV1000. Inductively coupled plasma mass spectrometry (ICP-MS) experiments were conducted on a PerkinElmer ELAN DRC-e.

## **Methods**

**Apoptosis assay :** The Annexin V-FITC and PI apoptosis detection kit was used to detect apoptosis and necrosis. 4T1 cells were stained with different concentrations of UCNP@BSA or UCNP@BSA@Ru for 4 h. Cell medium was changed for fresh one, and the light group was irradiated with a 470 nm (22.5 mW/cm<sup>2</sup>) LED lamp for 30 min, and then placed in an incubator for 10 h. The cells were trypsinized, harvested and washed 3 times with PBS, stained with Annexin V-FITC and PI, then detected by flow cytometry.

**Cellular uptake :** SKOV-3 and IOSE80 cells were cultured in a 25 cm<sup>2</sup> culture flask for 24 h. The examined agents were added, and cultured for 4 h. The cells were digested with trypsin, and collected with centrifugation after being washed three times with PBS. The uptake level was examined using ICP-MS by measurement of the Ru content or using confocal microscope to quantify the fluorescence intensity.

**Assay for the lysosomal membrane permeabilization (Acridine Orange assay) :**

The SKOV-3 cells were co-cultured with particles for 4 h, then irradiated with 470 nm LED light for 25 min. Then SKOV-3 cells were cultured for 20 min with a

medium containing 5  $\mu\text{M}$  acridine orange. Washed three times with PBS, culture medium was added, and images were collected with confocal microscope.

**JC-1 staining assay** : The SKOV-3 cells were co-cultured with particles for 4 h, then irradiated with 470 nm LED light for 25 min. Then SKOV-3 cells were cultured for 20 min with a medium containing 5  $\mu\text{M}$  JC-1. Washed three times with PBS, culture medium was added, and images were collected with confocal microscope.

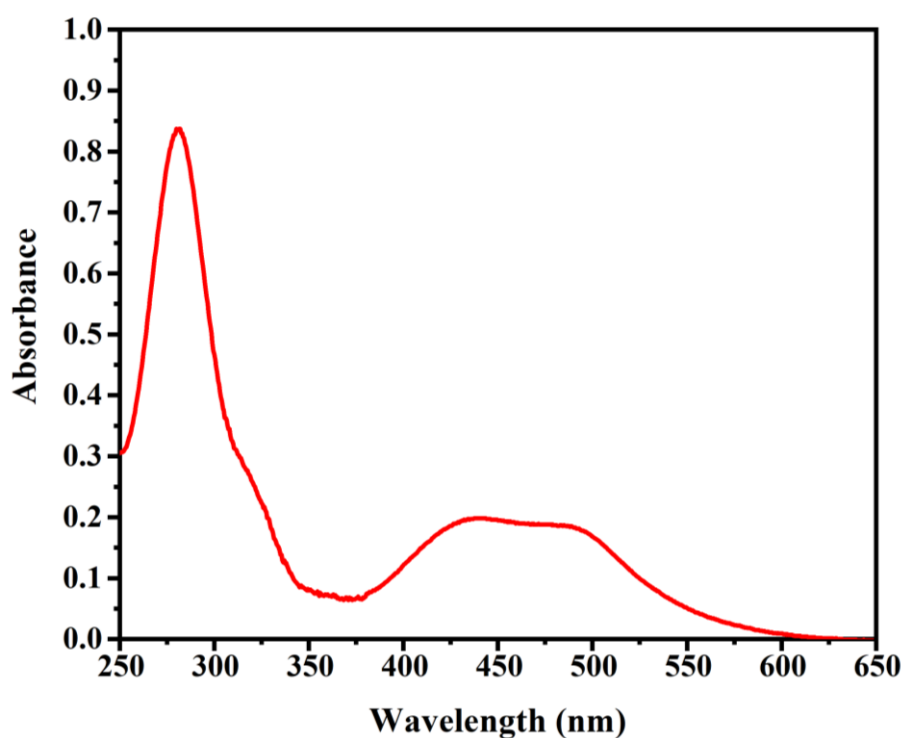

**Figure S1** Absorption spectrum of [Ru(dip)<sub>2</sub>(spq)]<sup>+</sup> (10  $\mu\text{M}$ ) in PBS

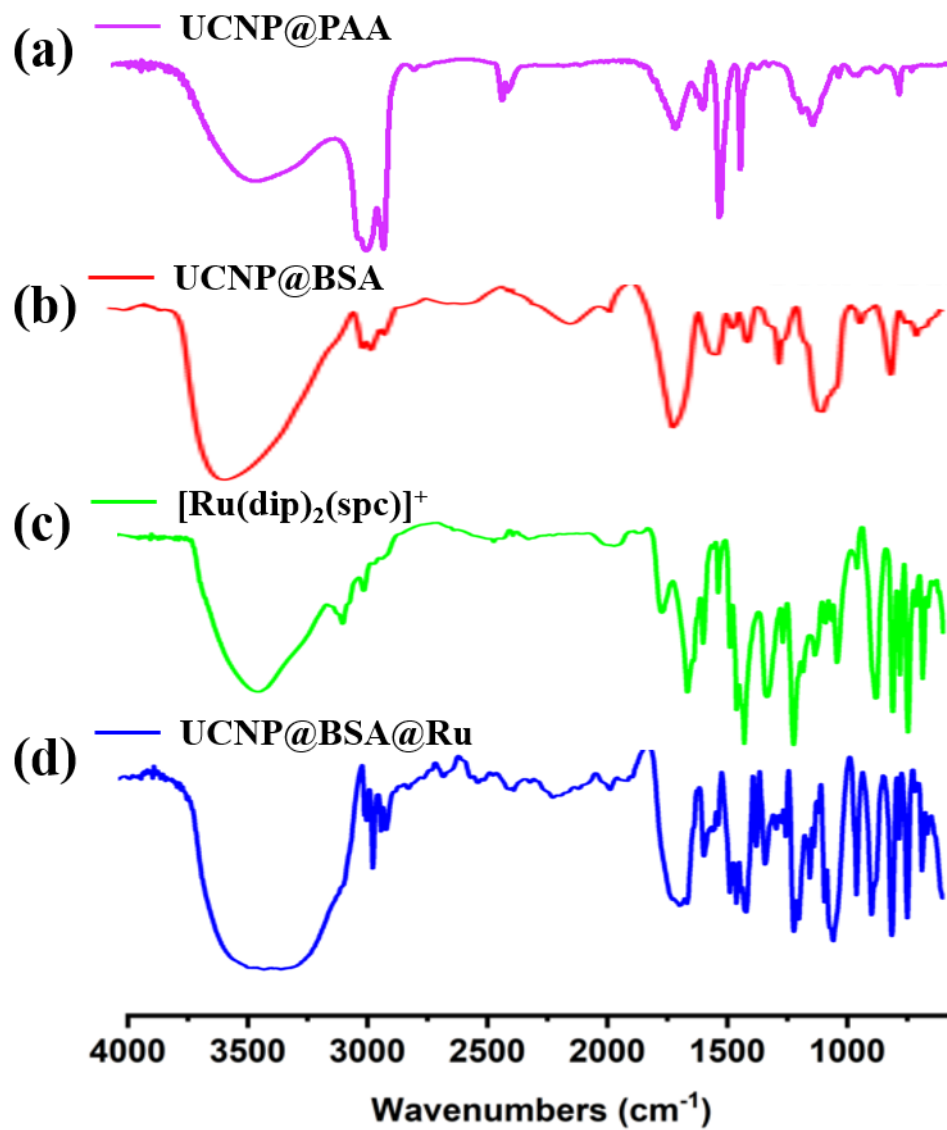

**Figure S2** FT-IR spectra of UCNP@PAA (a), UCNP@BSA (b),  $[\text{Ru}(\text{dip})_2(\text{spc})]^+$  (c), and UCNP@BSA@Ru (d).

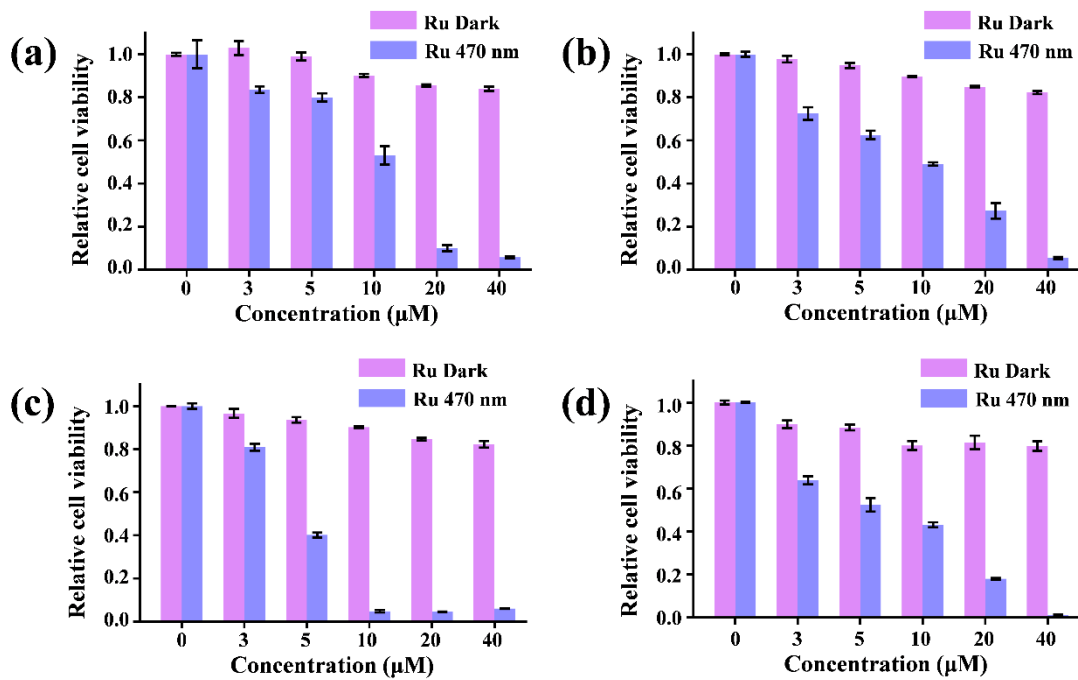

**Figure S3** Cytotoxicity of  $[\text{Ru}(\text{dip})_2(\text{spc})]^+$  (abbreviated as Ru in the legend) towards A549 (a), A549/DDP (b), IOSE80 (c) and SKOV-3 (d) cells in the dark (purple) and with 470 nm (blue) LED irradiation for 30 min ( $22.5 \text{ mW}/\text{cm}^2$ ).

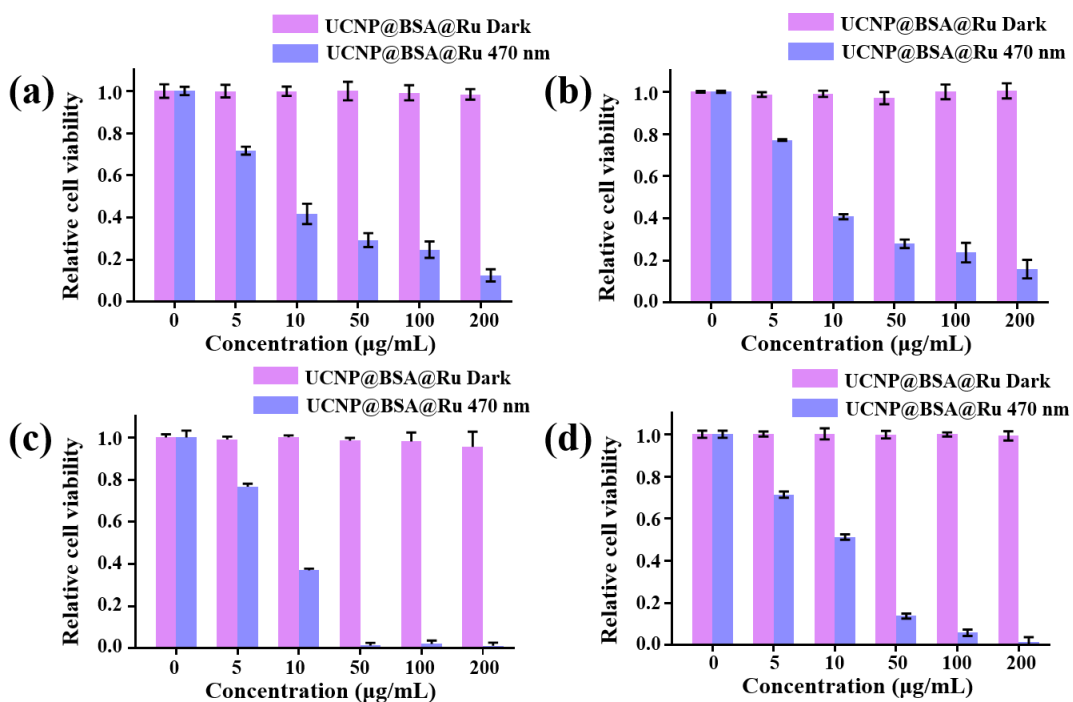

**Figure S4** Cytotoxicity of UCNP@BSA@Ru towards A549 (a), A549 in hypoxia (b), A549/DDP (c) and SKOV-3 (d) cells in the dark (purple) and with 470 nm (blue) LED irradiation for 30 min ( $22.5 \text{ mW}/\text{cm}^2$ ).

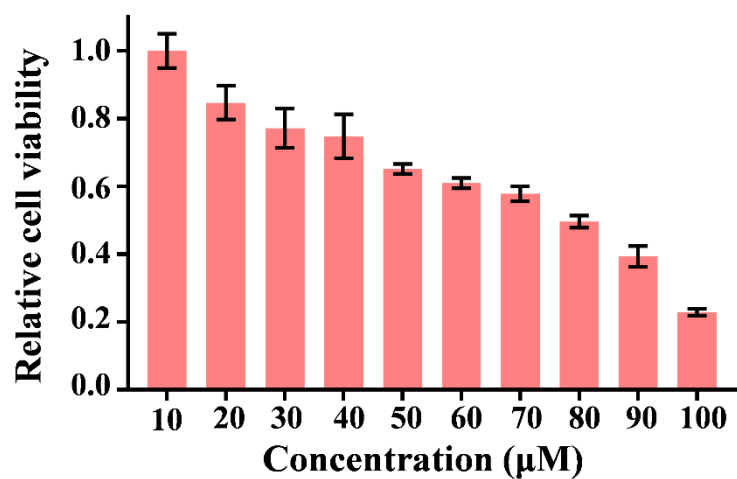

**Figure S5** Cytotoxicity of Cisplatin towards A549 cells in the dark.

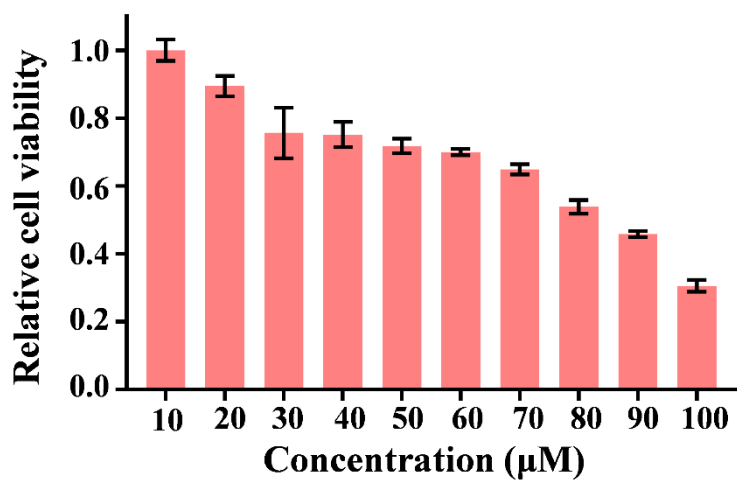

**Figure S6** Cytotoxicity of Cisplatin towards A549/DDP cells in the dark.

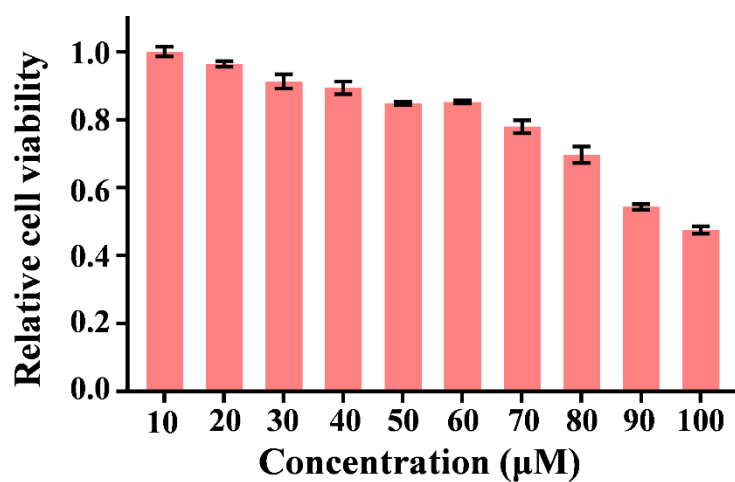

**Figure S7** Cytotoxicity of Cisplatin towards SKOV-3 cells in the dark.

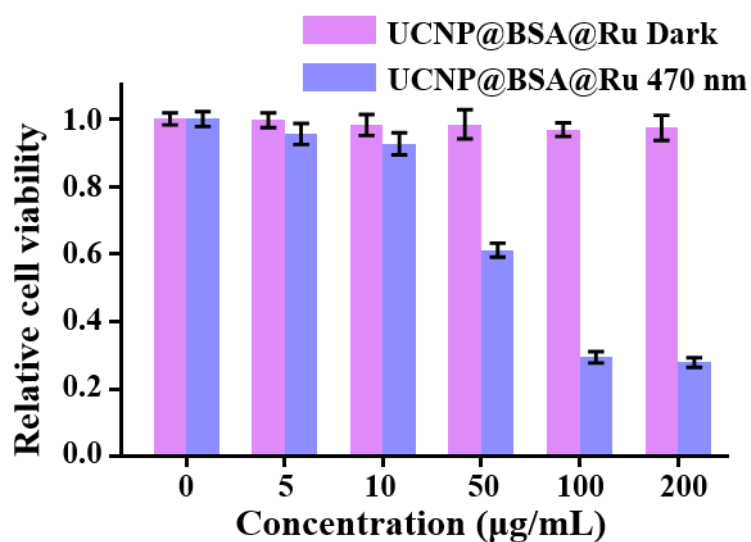

**Figure S8** Cytotoxicity of UCNP@BSA@Ru towards IOSE80 cells in the dark (purple) and with 470 nm (blue) LED irradiation for 30 min (22.5 mW/cm<sup>2</sup>).



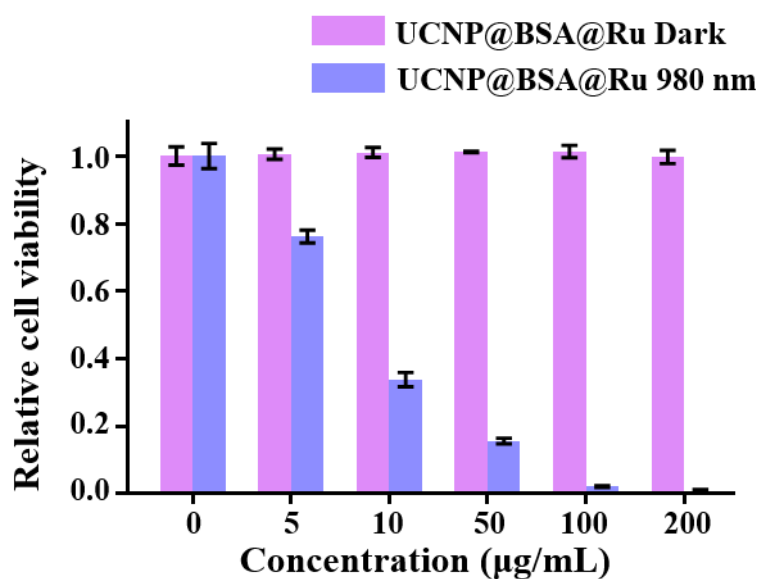

**Figure S9** Cytotoxicity of UCNP@BSA@Ru towards A549 cells in the dark (purple) and with 980 nm (blue) laser irradiation for 20 min (3 W/cm<sup>2</sup>).

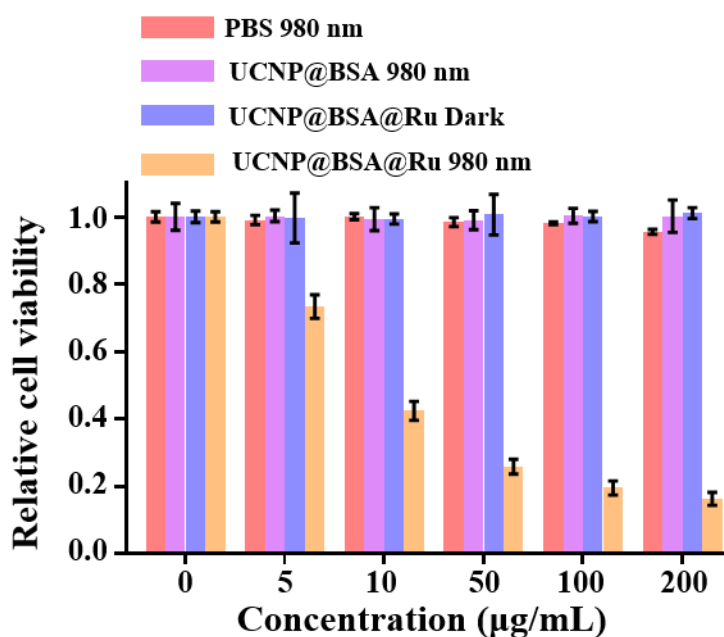

**Figure S10** Relative viability of 4T1 cells treated with PBS, various concentrations of UCNP@BSA and UCNP@BSA@Ru under irradiation (980 nm laser lamp for 20 min (3 W/cm<sup>2</sup>) or with UCNP@BSA@Ru in the dark.

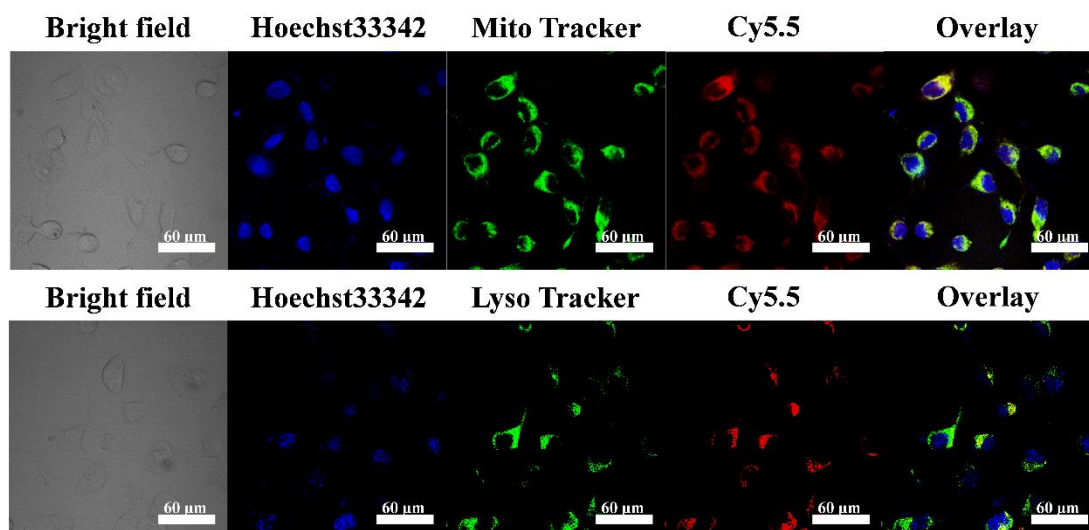

**Figure S11** Confocal microscopy images of the live SKOV-3 cells co-labeled with 20  $\mu\text{g}/\text{mL}$  the Cy5.5 modified UCNP@BSA@Ru nanoparticles for 4 h and then co-stained with Hoechst 33342, Mito-tracker Green (200 nM) or Lyso-tracker Green (200 nM) for 30 min. Hoechst 33342:  $\lambda_{\text{ex}} = 403 \text{ nm}$ ,  $\lambda_{\text{em}} = 450 \pm 20 \text{ nm}$ ; Mito-tracker Green:  $\lambda_{\text{ex}} = 488 \text{ nm}$ ,  $\lambda_{\text{em}} = 516 \pm 20 \text{ nm}$ . Lsyo-Tracker Green:  $\lambda_{\text{ex}} = 488 \text{ nm}$ ,  $\lambda_{\text{em}} = 511 \pm 20 \text{ nm}$ ; Cy5.5:  $\lambda_{\text{ex}} = 641 \text{ nm}$ ,  $\lambda_{\text{em}} = 710 \pm 20 \text{ nm}$ ; Scale bars = 60  $\mu\text{m}$ .

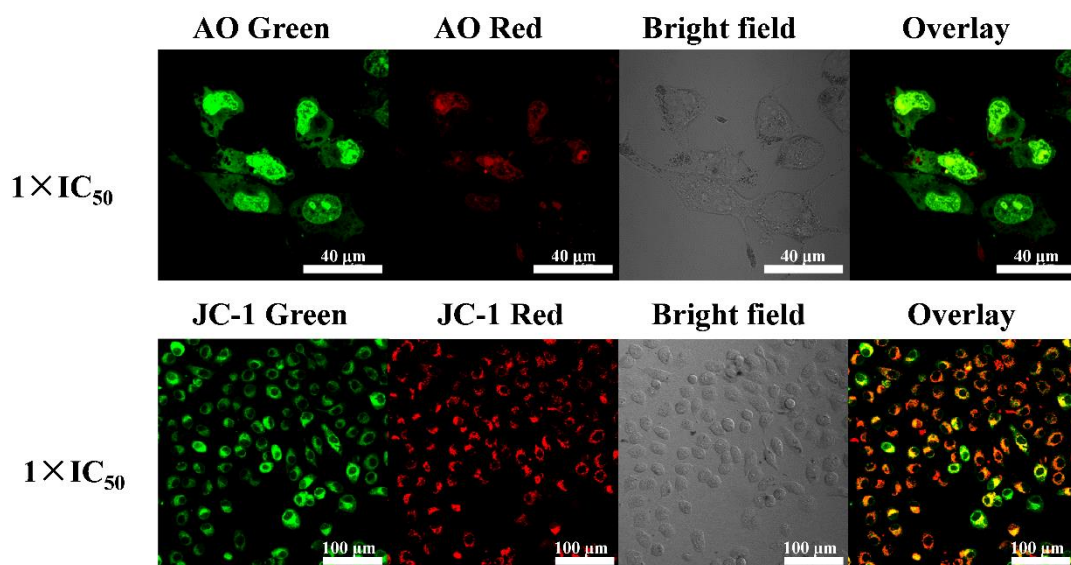

**Figure S12** Images of AO (a) or JC-1 (b) stained SKOV-3 cells treated by UCNP@BSA@Ru ( $1 \times \text{IC}_{50}$  value) and 470 nm irradiation ( $22.5 \text{ mW}/\text{cm}^2$  for 30 min). (green fluorescence:  $\lambda_{\text{ex}} = 488 \text{ nm}$  and  $\lambda_{\text{em}} = 510 \pm 20 \text{ nm}$ ; red fluorescence:  $\lambda_{\text{ex}} = 488 \text{ nm}$  and  $\lambda_{\text{em}} = 625 \pm 20 \text{ nm}$ ).

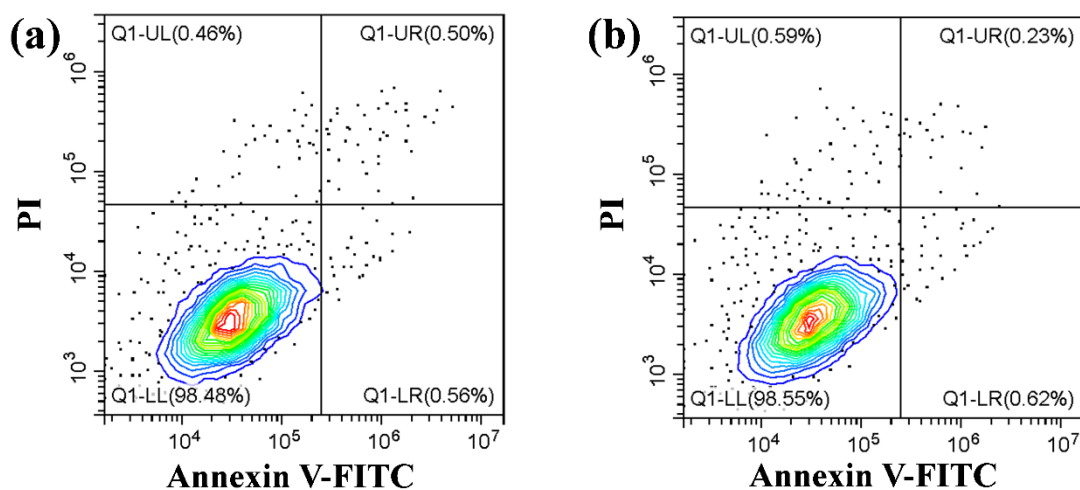

**Figure S13** Flow-cytometric analysis of 4T1 cells based on Annexin V-FITC and PI staining. The cells were in the dark (a) or treated with only 470 nm irradiation for 30 min (b) ( $22.5 \text{ mW/cm}^2$ ).

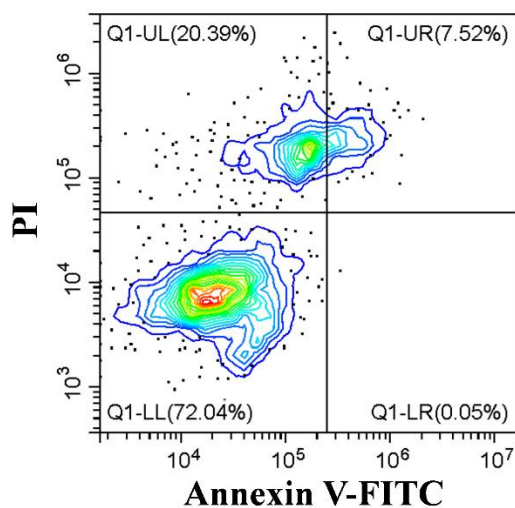

**Figure S14** Flow-cytometric analysis of 4T1 cells based on Annexin V-FITC and PI staining. The cells were treated by both UCNP@BSA@Ru and 470 nm irradiation for 30 min ( $22.5 \text{ mW/cm}^2$ ).

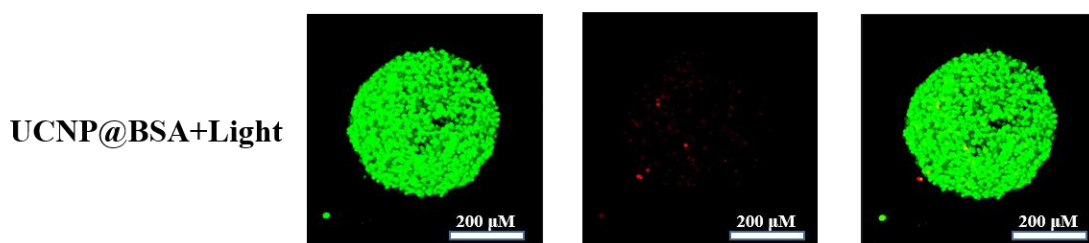

**Figure S15** Images of 4T1 3D MCSs treated by UCNP@BSA ( $50 \mu\text{g/mL}$ ) with 980 nm irradiation ( $3 \text{ W/cm}^2$  for 20 min), and stained by Calcein-AM and PI. Scale bars: 200  $\mu\text{m}$ .

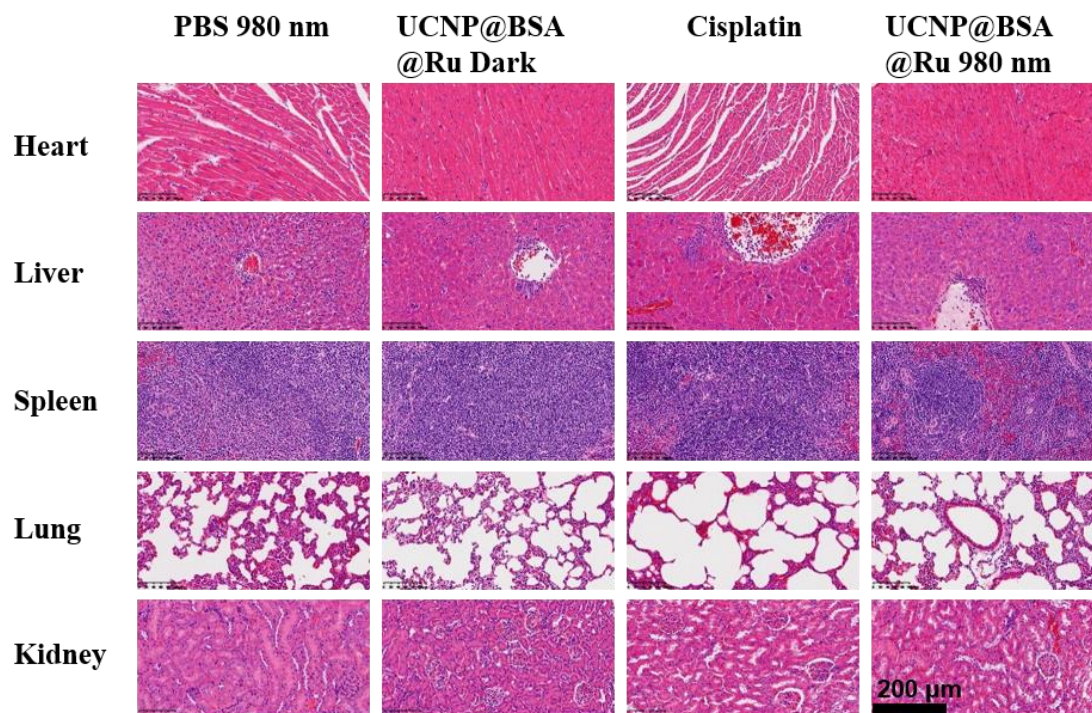

**Figure S16** Histological analysis of the organs acquired from mice bearing 4T1 tumors on the 14th day after various treatments as indicated. Scale bars: 200  $\mu\text{m}$
